# Supplementary material
Source: PubMed Central journal article supplement (PMC3497434)
Supplement: IAI.00752-12_zii999099883so1.pdf [file IAI.00752-12_zii999099883so1.pdf]

Table S1. Proportion of each predictor gene by *E. coli* pathotype.

| <b>Proportion of isolates encoding gene</b> |        |                  |                 |        |        |         |
|---------------------------------------------|--------|------------------|-----------------|--------|--------|---------|
| <b>Gene</b>                                 | DEC    | Animal commensal | Human commensal | APEC   | NMEC   | UPEC    |
|                                             | (n=29) | (n=32)           | (n=67)          | (n=30) | (n=30) | (n=293) |
| <i>vat</i>                                  | 0.00   | 0.09             | 0.33            | 0.50   | 0.57   | 0.58    |
| <i>fyuA</i>                                 | 0.24   | 0.31             | 0.60            | 0.57   | 0.90   | 0.87    |
| <i>chuA</i>                                 | 0.28   | 0.28             | 0.52            | 0.57   | 0.80   | 0.78    |
| <i>yfcV</i>                                 | 0.00   | 0.19             | 0.48            | 0.23   | 0.83   | 0.69    |

Table S2. Proportion of each predictor gene in subdivisions of the pathotypes.

| <b>Gene</b> | <b>DEC</b>  |             |             | <b>APEC</b>  |              |              | <b>UPEC</b> |                 |                  |                       |
|-------------|-------------|-------------|-------------|--------------|--------------|--------------|-------------|-----------------|------------------|-----------------------|
|             | <b>EPEC</b> | <b>ETEC</b> | <b>EHEC</b> | <b>APEC1</b> | <b>APEC2</b> | <b>APEC3</b> | <b>ABU</b>  | <b>Cystitis</b> | <b>Comp. UTI</b> | <b>Pyelonephritis</b> |
| <i>vat</i>  | 0.00        | 0.00        | 0.00        | 0.30         | 0.60         | 0.60         | 0.6         | 0.55            | 0.49             | 0.68                  |
| <i>fyuA</i> | 0.10        | 0.20        | 0.40        | 0.50         | 0.60         | 0.60         | 0.85        | 0.84            | 0.85             | 0.94                  |
| <i>chuA</i> | 0.50        | 0.00        | 0.30        | 0.50         | 0.60         | 0.60         | 0.71        | 0.82            | 0.68             | 0.90                  |
| <i>yfcV</i> | 0.00        | 0.00        | 0.00        | 0.10         | 0.30         | 0.30         | 0.66        | 0.71            | 0.62             | 0.77                  |
